# Supplementary material for: Do autonomy, self-efficacy, vitality, and fatigue predict daily morning heart rate variability? A running intervention study in healthy women
Source: Research Square preprint supplement (doi:10.21203/rs.3.rs-6285008/v1), 2025-04-22
Supplement: Supplementary file 1 [file 66cf87a22964fc01333fb543.pdf]

*Online Resource 2: Data visualization of Participants and Groups*

**Do autonomy, self-efficacy, vitality, and fatigue predict daily morning heart rate variability?**

**A running intervention study in healthy women**

Applied Psychophysiology and Biofeedback

**Laura Buchner\*, Günter Amesberger, Sabine Würth, and Thomas Finkenzeller**

**\* Correspondence:**

Laura Buchner

Laura.buchner@plus.ac.at

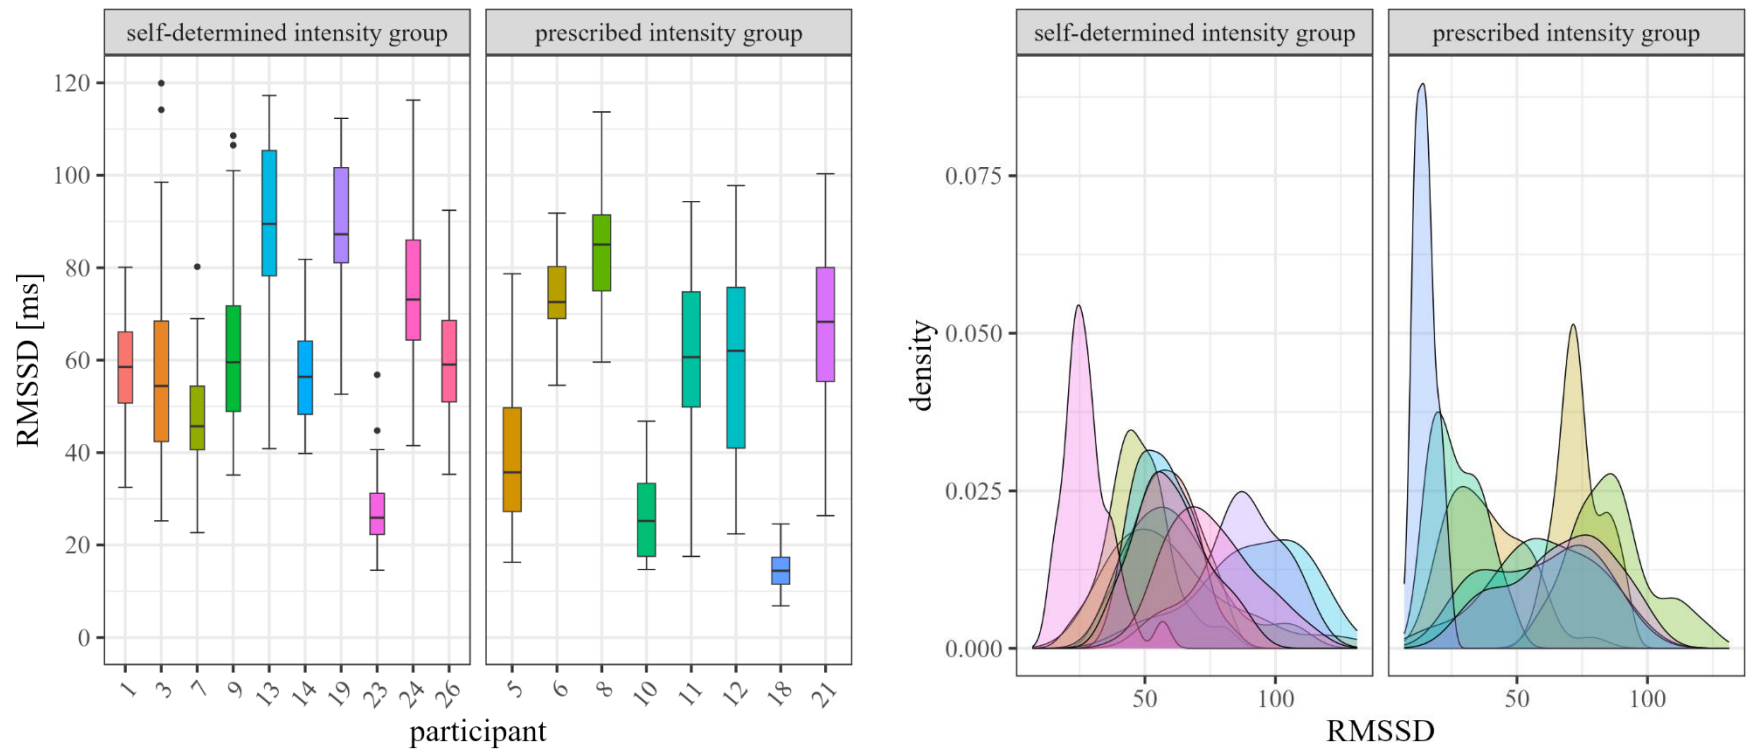

Figure ESM1a: Participantwise boxplots of morning RMSSD per intervention group

Figure ESM1b: Participantwise density plots of morning RMSSD per intervention group

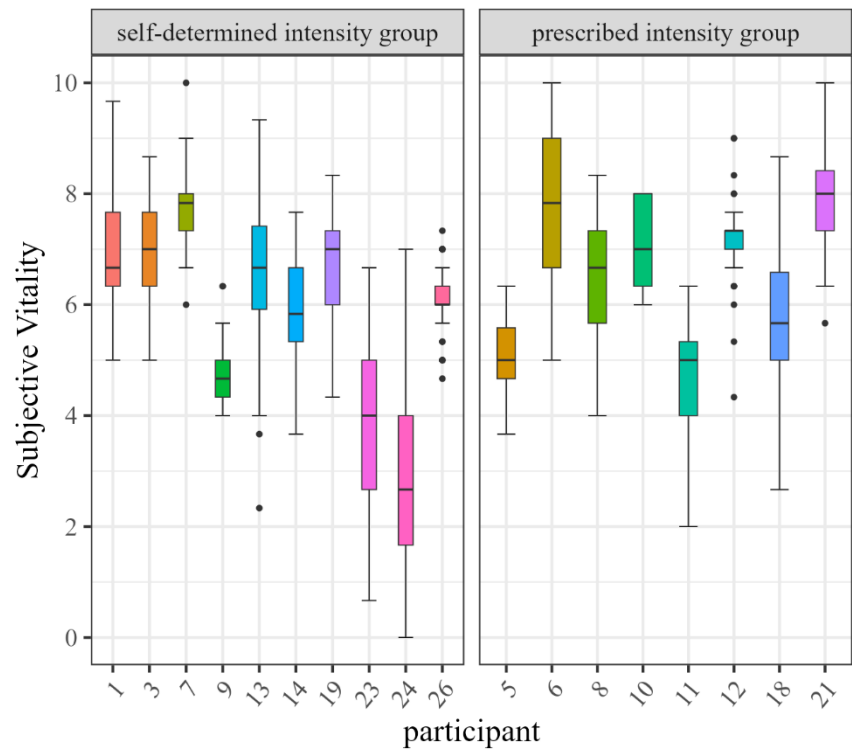

Figure ESM2a: Participantwise boxplots of morning subjective vitality per intervention group

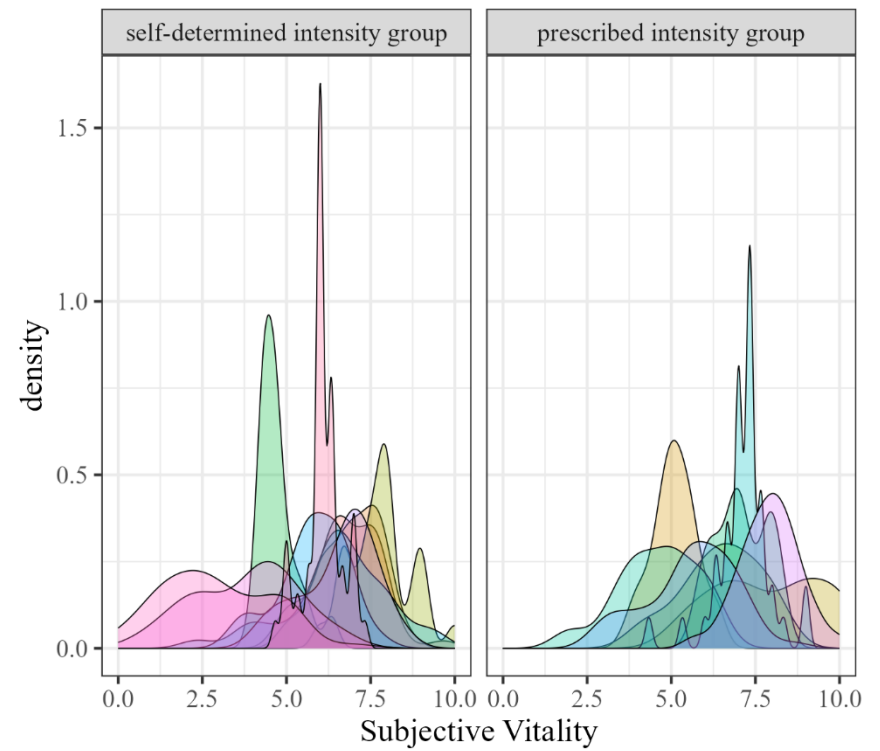

Figure ESM2b: Participantwise density plots of morning subjective vitality per intervention group

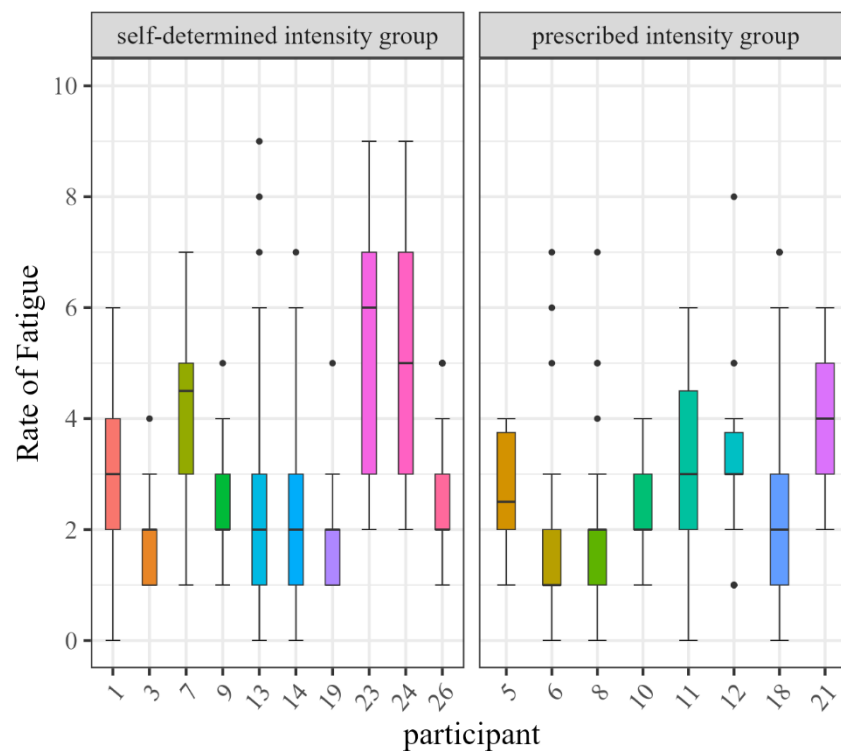

Figure ESM3a: Participantwise boxplots of morning fatigue per intervention group

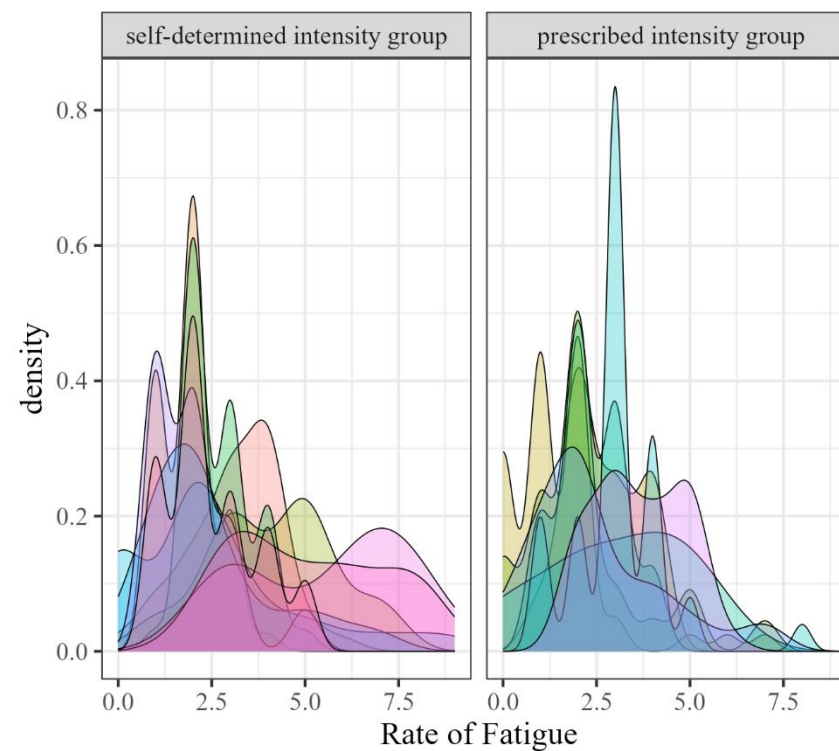

Figure ESM3b: Participantwise density plots of morning fatigue per intervention group

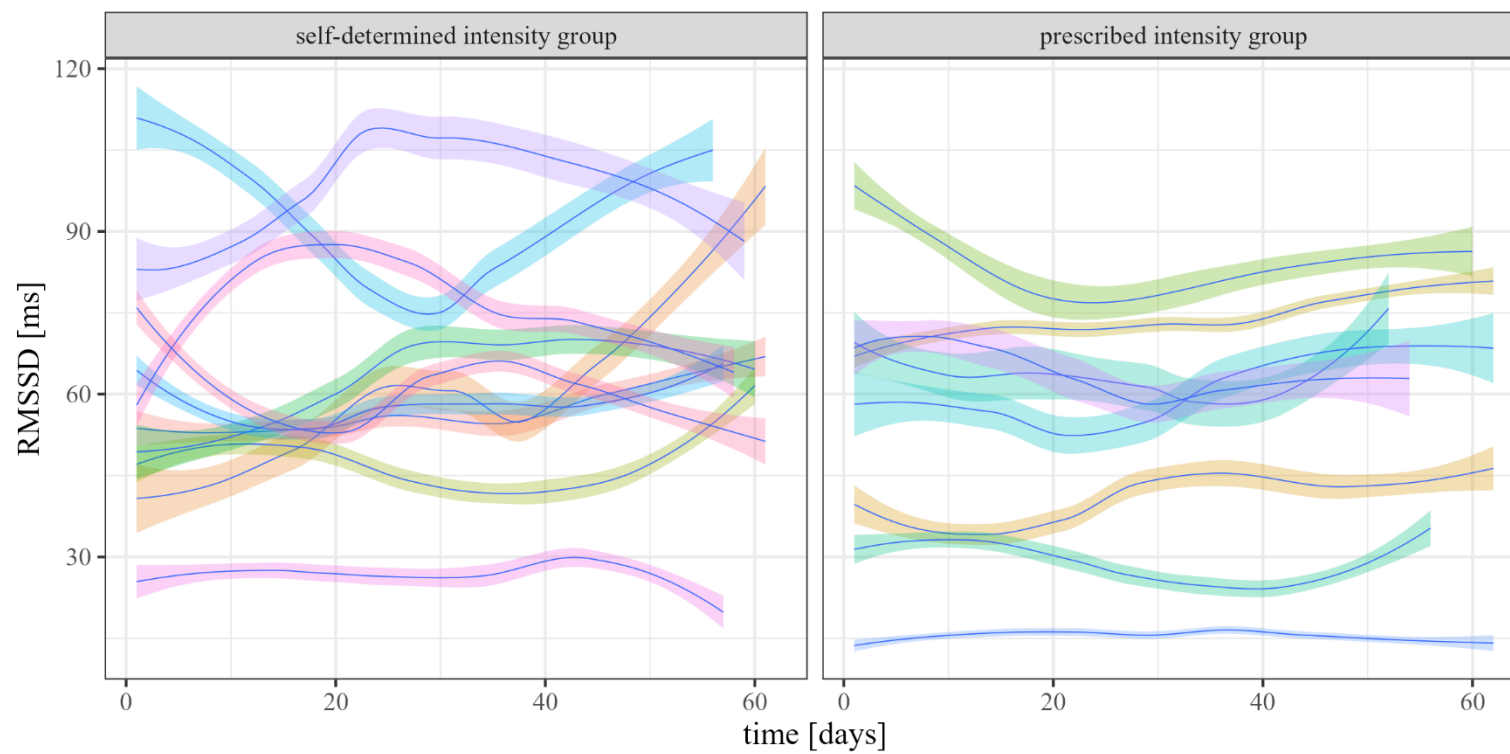

Figure ESM4: Time trend of morning RMSSD across intervention days

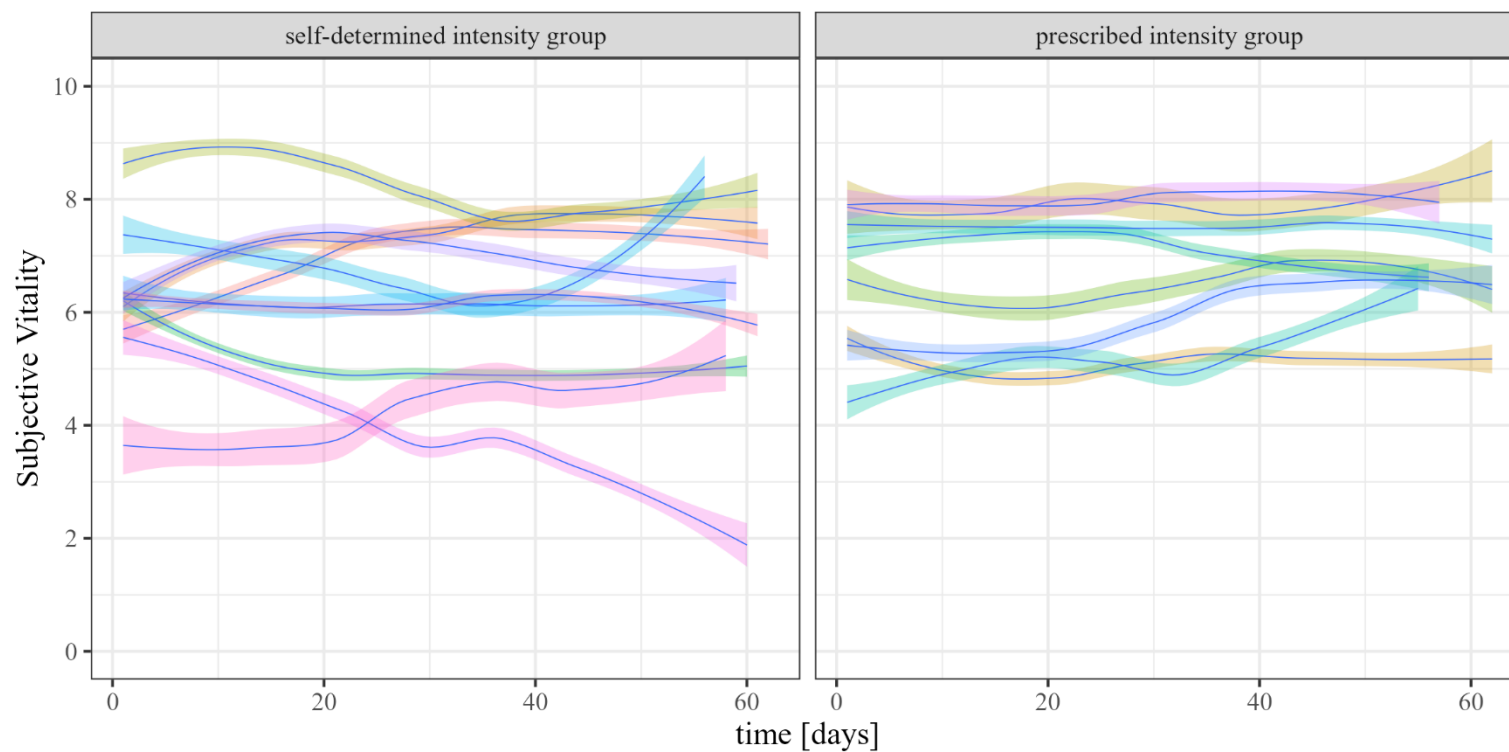

Figure ESM5: Time trend of morning vitality across intervention days

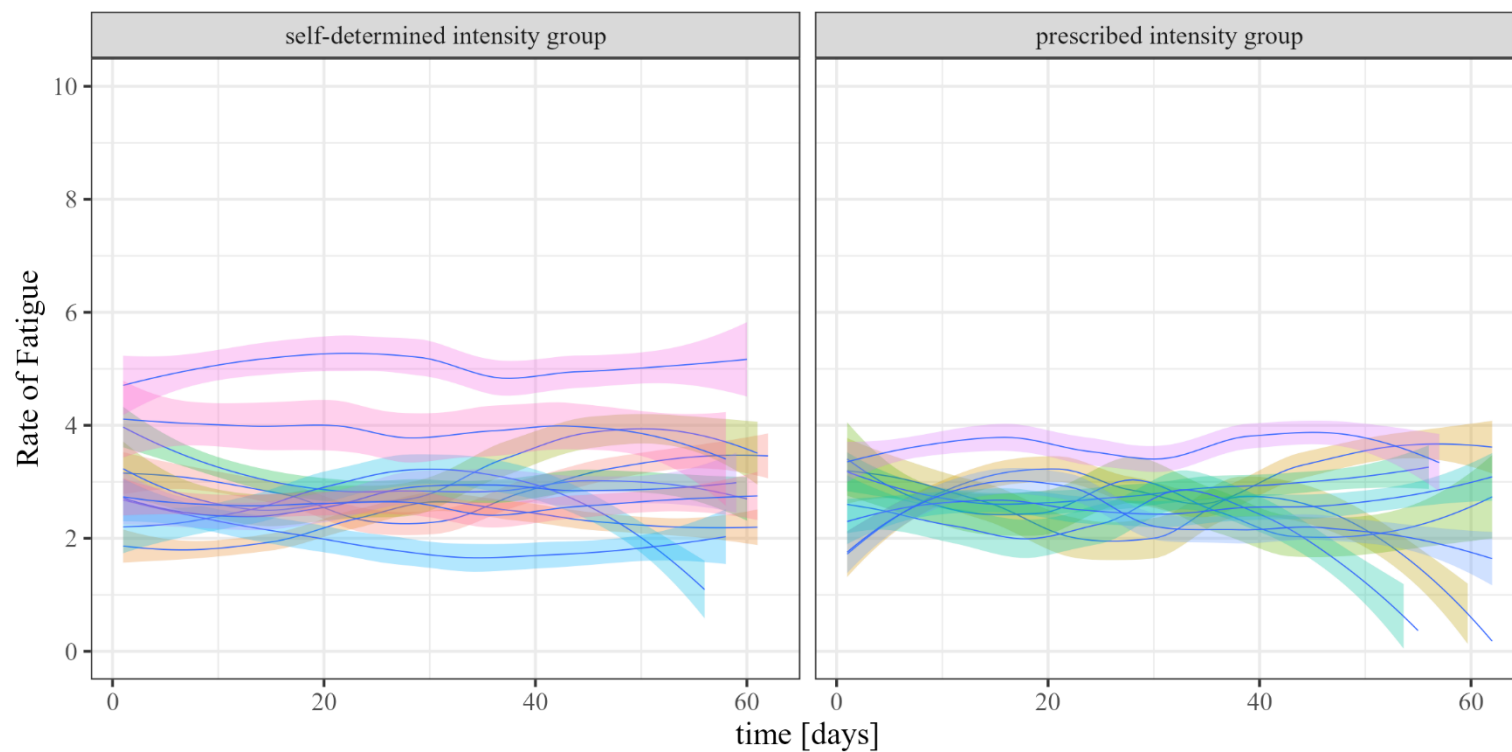

Figure ESM6: Time trend of morning fatigue across intervention days

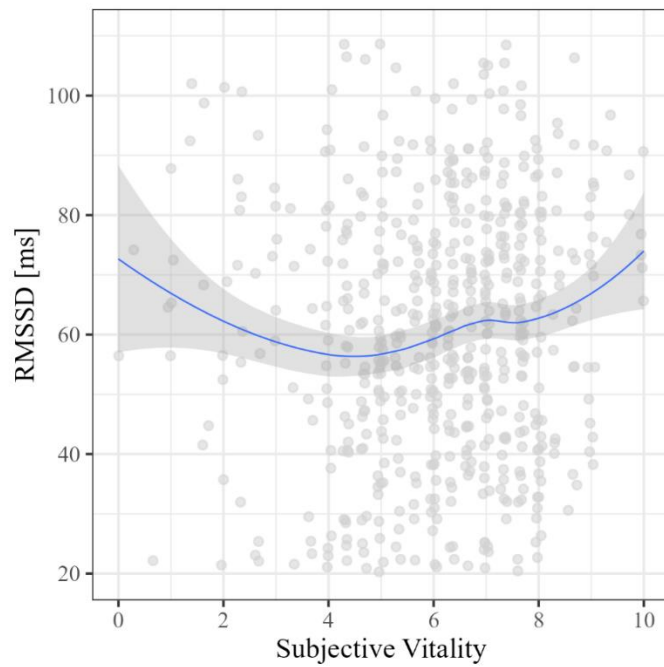

Figure ESM7a: Relationship between morning RMSSD and morning vitality across intervention days and participants

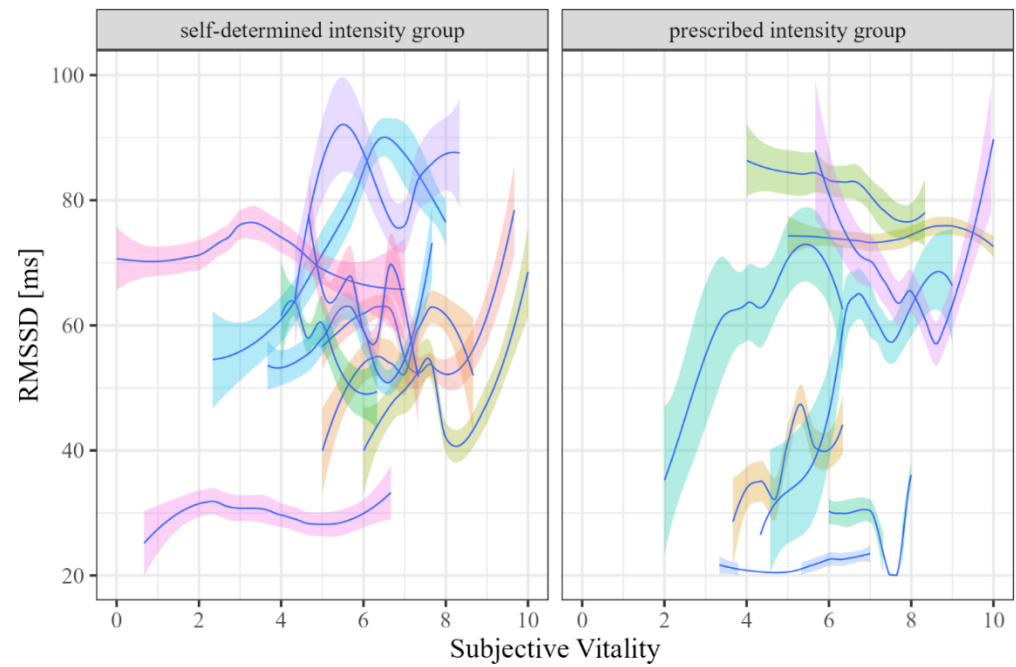

Figure ESM7b: Participantwise relationship between morning RMSSD and morning vitality across intervention days per intervention group



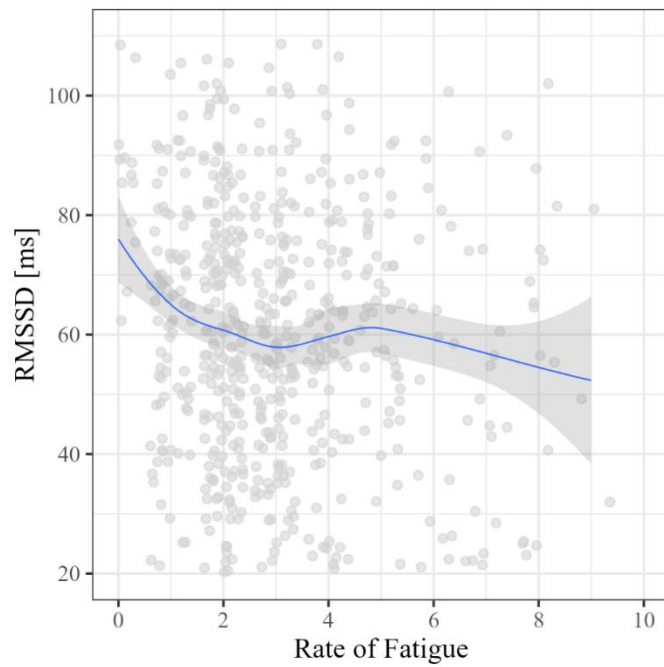

Figure ESM8a: Relationship between morning RMSSD and morning fatigue across intervention days and participants

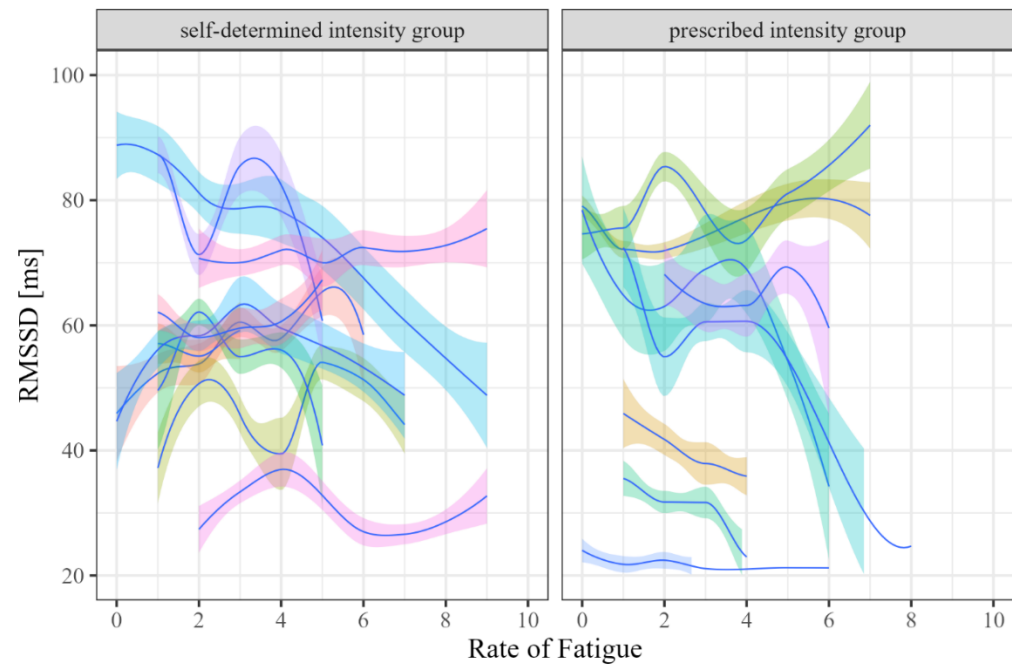

Figure ESM8b: Participantwise relationship between morning RMSSD and morning fatigue across intervention days per intervention group

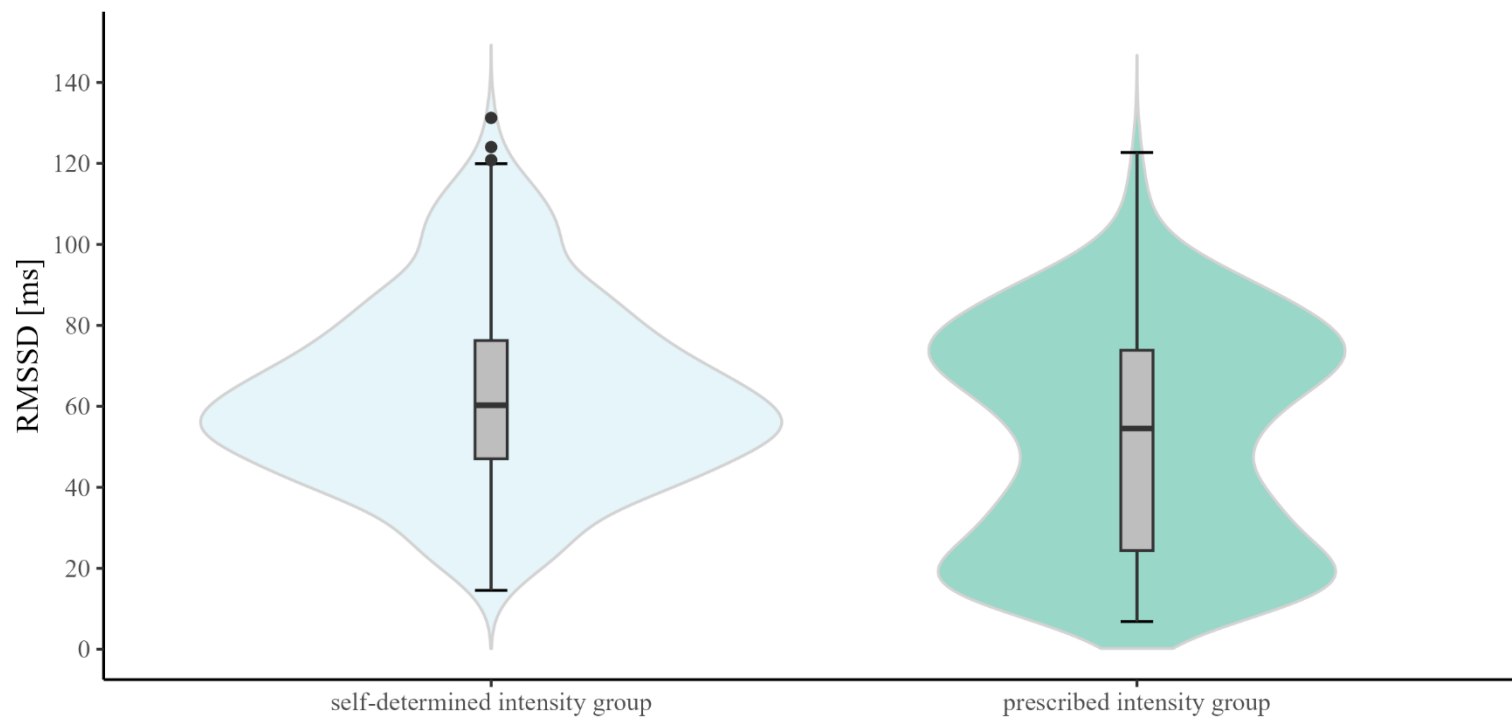

Figure ESM9: Violin plots of morning RMSSD per intervention group
