# Supplementary material for: Do autonomy, self-efficacy, vitality, and fatigue predict daily morning heart rate variability? A running intervention study in healthy women
Source: Research Square preprint supplement (doi:10.21203/rs.3.rs-6285008/v1), 2025-04-22
Supplement: Supplementary file 2 [file f690913115cb63c105da61dd.pdf]

***Online Resource 1: Model Equations for Multilevel Analysis***

**Do autonomy, self-efficacy, vitality, and fatigue predict daily morning heart rate variability? A running intervention study in healthy women**

Applied Psychophysiology and Biofeedback

**Laura Buchner\*, Günter Amesberger, Sabine Würth, and Thomas Finkenzeller**

**\* Correspondence:**

Laura Buchner

Laura.buchner@plus.ac.at

**Model equations H1-H5**

On level 1  $\gamma_{ij}$  is the outcome variable for individual  $i$  at time  $j$ . Beta coefficients represent the intercept ( $\beta_{0j}$ ), the autoregressive effect ( $\beta_{1j}$ ) and the effects of time ( $\beta_{2j}$ ), type of day ( $\beta_{3j}$ ), vitality ( $\beta_{4j}$ ), fatigue ( $\beta_{5j}$ ), Group ( $\beta_{6j}$ ),  $VO_{2max}$  ( $\beta_{7j}$ ), self-efficacy ( $\beta_{8j}$ ), motivation ( $\beta_{9j}$ ), and the co-variate ( $\beta_{10j}$ ). Residual variation is displayed by ( $\varepsilon_{ij}$ ). On level 2 we included a random term ( $\mu_{0j}$ ) to model variation in intercepts ( $\gamma_{00}$ ).

**Effects on daily morning vmHRV**

Level 1:

$$\gamma(\text{RMSSDlog}(t))_{ij} = \beta_{0j} + \beta_{1j}(\text{RMSSDlog}(t-1))_{ij} + \beta_{2j}(\text{time})_{ij} + \beta_{3j}(\text{type of day}(t))_{ij} + \beta_{4j}(\text{vitality})_{ij} \\ + \beta_{5j}(\text{fatigue})_{ij} + \beta_{6j}(\text{Group})_{ij} + \beta_{7j}(\text{VO2max})_{ij} + \beta_{8j}(\text{self-efficacy})_{ij} + \beta_{9j}(\text{motivation})_{ij} + \beta_{10j}(\text{co-variate})_{ij} + \varepsilon_{ij}$$

Level 2:  $\beta_{0j} = \gamma_{00} + \mu_{0j}$

**Effects on daily morning vmHRV controlled by heart period**

Level 1:

$$\begin{aligned} \gamma(\text{RMSSDlog}(t))_{ij} = & \beta_{0j} + \beta_{1j}(\text{RMSSDlog}(t-1))_{ij} + \beta_{2j}(\text{time})_{ij} + \beta_{3j}(\text{type of day}(t))_{ij} + \beta_{4j}(\text{vitality})_{ij} \\ & + \beta_{5j}(\text{fatigue})_{ij} + \beta_{6j}(\text{Group})_{ij} + \beta_{7j}(\text{Vo2max})_{ij} + \beta_{8j}(\text{self-efficacy})_{ij} + \beta_{9j}(\text{vitality})_{ij} + \beta_{10j}(\text{RRlog})_{ij} + \varepsilon_{ij} \end{aligned}$$

$$\text{Level 2: } \beta_{0j} = \gamma_{00} + \mu_{0j}$$

**Effects on daily morning heart period**

$$\begin{aligned} \text{Level 1: } \gamma(\text{RRlog}(t))_{ij} = & \beta_{0j} + \beta_{1j}(\text{RRlog}(t-1))_{ij} + \beta_{2j}(\text{time})_{ij} + \beta_{3j}(\text{type of day}(t))_{ij} + \beta_{4j}(\text{vitality})_{ij} \\ & + \beta_{5j}(\text{fatigue})_{ij} + \beta_{6j}(\text{Group})_{ij} + \beta_{7j}(\text{VO2max})_{ij} + \beta_{8j}(\text{self-efficacy})_{ij} + \beta_{9j}(\text{vitality})_{ij} + \varepsilon_{ij} \end{aligned}$$

$$\text{Level 2: } \beta_{0j} = \gamma_{00} + \mu_{0j}$$

**Effects on daily morning vmHRV controlled by heart period**

$$\begin{aligned} \text{Level 1: } \gamma(\text{RRlog}(t))_{ij} = & \beta_{0j} + \beta_{1j}(\text{RRlog}(t-1))_{ij} + \beta_{2j}(\text{time})_{ij} + \beta_{3j}(\text{type of day}(t))_{ij} + \beta_{4j}(\text{vitality})_{ij} \\ & + \beta_{5j}(\text{fatigue})_{ij} + \beta_{6j}(\text{Group})_{ij} + \beta_{7j}(\text{Vo2max})_{ij} + \beta_{8j}(\text{self-efficacy})_{ij} + \beta_{9j}(\text{vitality})_{ij} + \beta_{10j}(\text{RMSSDlog})_{ij} + \varepsilon_{ij} \end{aligned}$$

$$\text{Level 2: } \beta_{0j} = \gamma_{00} + \mu_{0j}$$
